# Supplementary material for: Comparative analysis of differentially secreted proteins in serum-free and serum-containing media by using BONCAT and pulsed SILAC
Source: PubMed Central journal article supplement (PMC6395664; doi:10.1038/s41598-019-39650-z), 2019-02-28
Supplement: 41598_2019_39650_MOESM1_ESM.pdf [file 41598_2019_39650_MOESM1_ESM.pdf]

## Supporting Information

### Comparative analysis of differentially secreted proteins in serum-free and serum-containing media by using BONCAT and pulsed SILAC

Jihye Shin<sup>a,1</sup>, Jiheon Rhim<sup>b,c</sup>, Yumi Kwon<sup>a,d</sup>, Sun Young Choi<sup>b,c,e</sup>, Sungho Shin<sup>a,f</sup>, Chul-Won Ha<sup>b,c,e</sup> and Cheolju Lee<sup>a,f,g\*</sup>

<sup>a</sup> Center for Theragnosis, Korea Institute of Science and Technology, Seoul 02792, Korea

<sup>b</sup> Department of Orthopedic Surgery, Samsung Medical Center, Sungkyunkwan University School of Medicine, Seoul 06351, Korea

<sup>c</sup> Stem Cell & Regenerative Medicine Institute, Samsung Medical Center, Seoul 06351, Korea

<sup>d</sup> Department of Life Science and Research Institute for Natural Sciences, Hanyang University, Seoul 04763, Korea

<sup>e</sup> Department of Health Sciences and Technology, SAIHST, Sungkyunkwan University, Seoul 06351, Korea

<sup>f</sup> Department of Converging Science and Technology, KHU-KIST, Kyung Hee University, Seoul 02447, Korea

<sup>g</sup> Division of Bio-Medical Science & Technology, KIST School, Korea University of Science and Technology, Seoul 02792, Korea

<sup>1</sup> Current address: Advanced Medical Research Center, Yokohama City University, Fukuura 3-9, 8 Kanazawa, Yokohama 236-0004, Japan

\* Corresponding author

#### Tables of contents

|                                                                                                            |   |
|------------------------------------------------------------------------------------------------------------|---|
| <b>Figure S1.</b> AHA labeling and cell viability .....                                                    | 2 |
| <b>Figure S2.</b> Optimization of CuAAC enrichment of secreted proteins .....                              | 3 |
| <b>Figure S3.</b> Peptide sequence matches (PSM) of MS data for the secretome of BONCAT-pSILAC .....       | 4 |
| <b>Figure S4.</b> Proteins identified in three replicate experiments of U87MG and hWJ-MSC secretomes ..... | 5 |
| <b>Figure S5.</b> The percentage of FBS contamination inferred by PSMs matched to bovine proteins .....    | 6 |
| <b>Figure S6.</b> Growth of U87MG and hWJ-MSC as measured by cell counting .....                           | 7 |
| <b>Figure S7.</b> Full-length western blot images of Fig. 3d and Fig. 4f .....                             | 8 |

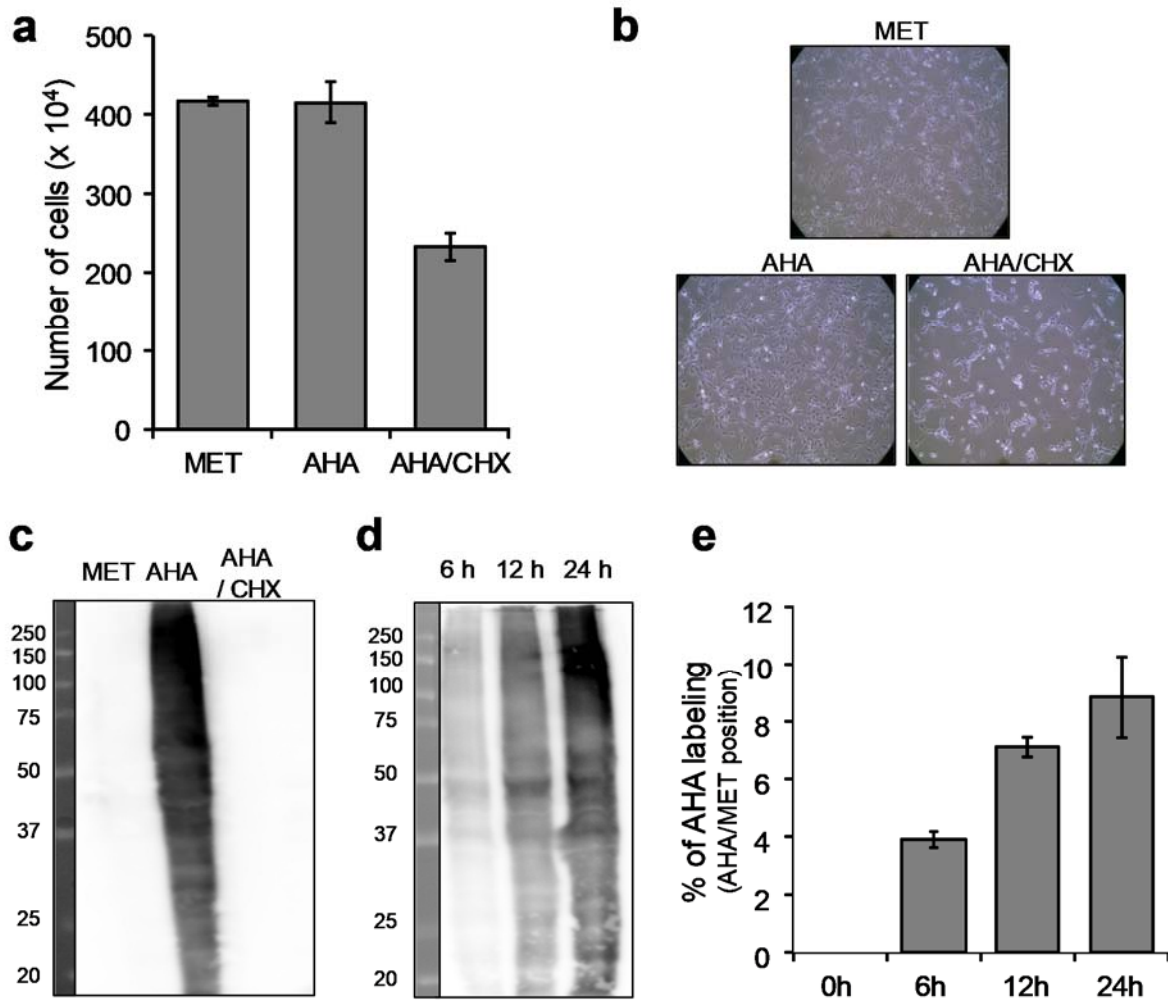

**Figure S1. AHA labeling and cell viability.** (a-c) U87MG cell lysates incubated for 24 h in media with 10% FBS and either 1 mM methionine (MET), 1 mM AHA (AHA) or 1 mM AHA and 10  $\mu$ g/mL cycloheximide (AHA/CHX). The number (a) and morphologies (b) of U87MG cells were similar between AHA and methionine-treated cells. (c) CuAAC was performed on U87MG cell lysates, and the lysate was analyzed by western blot using an anti-biotin antibody. (d-e) AHA incorporation rate according to cell culture time as determined by western blot (d) and LC-MS/MS (e).

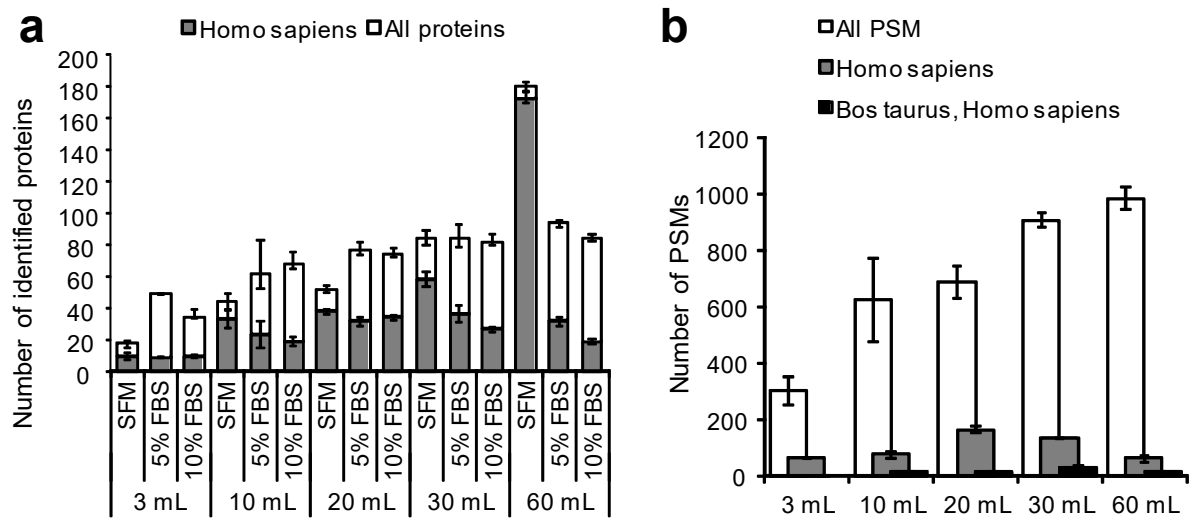

**Figure S2. Optimization of CuAAC enrichment of secreted proteins.** (a) Shown are the number of identified proteins after CuAAC enrichment of the conditioned media concentrated from 3, 10, 20, 30 and 60 mL at three different conditions (SFM, 5% FBS-containing medium, 10% FBS-containing medium). (b) Number of PSMs identified at 10% FBS-containing medium condition. Grey bar: PSMs matched to human sequence. Black bar: PSMs matched to homologous sequences between human and bovine. Note that a Human-FBS composite database was used for the analysis of MS data.

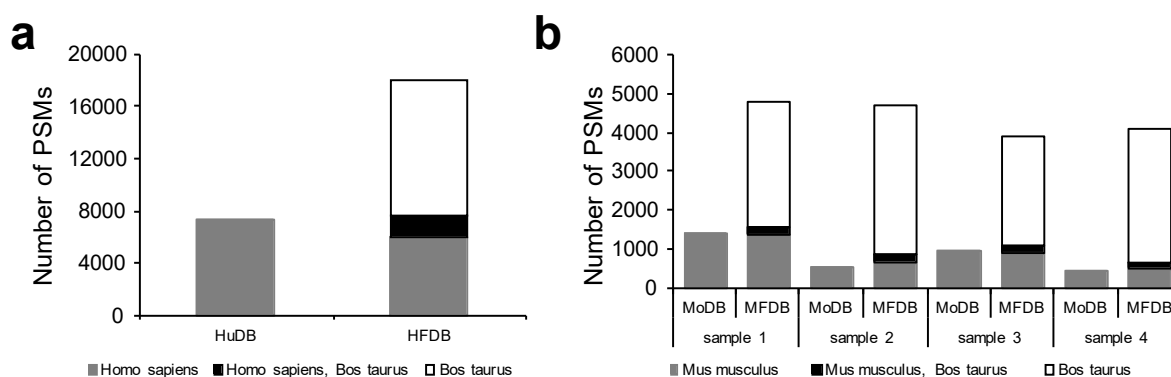

**Figure S3. Peptide sequence matches (PSM) of MS data for the secretome of BONCAT-pSILAC.**

**(a)** The search results of U87MG secretome against human database (HuDB) and human-FBS database (HFDB) **(b)** Re-analysis results of a previous study (Eichelbaum, K.; Krijgsveld, J., Rapid temporal dynamics of transcription, protein synthesis, and secretion during macrophage activation. *Mol Cell Proteomics* **2014**, 13: 792-810) in which newly secreted proteins in 10% FBS-containing medium after mouse macrophage activation were analyzed. The MS data were searched against mouse Uniprot database (MoDB) and mouse-FBS database (MFDB). The FBS database contains 199 bovine protein entries. Black areas in both bar charts represent PSMs matching to both species (human and bovine in **a**; mouse and bovine in **b**) due to sequence homology.

**a**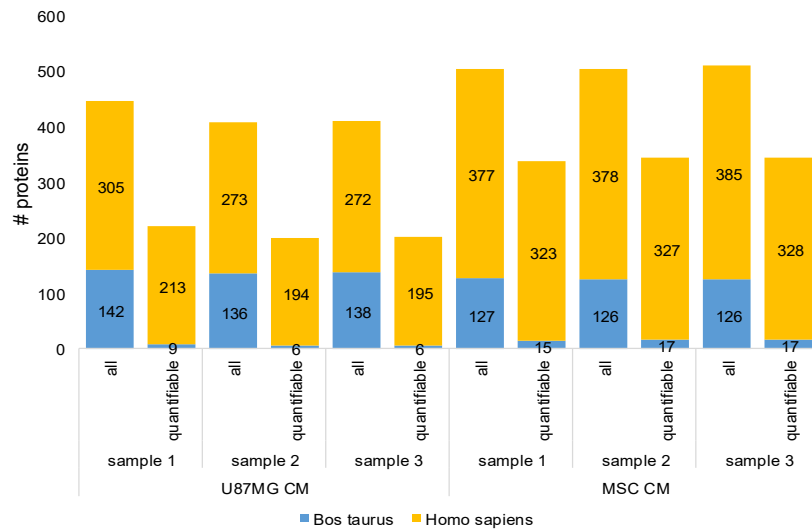**b**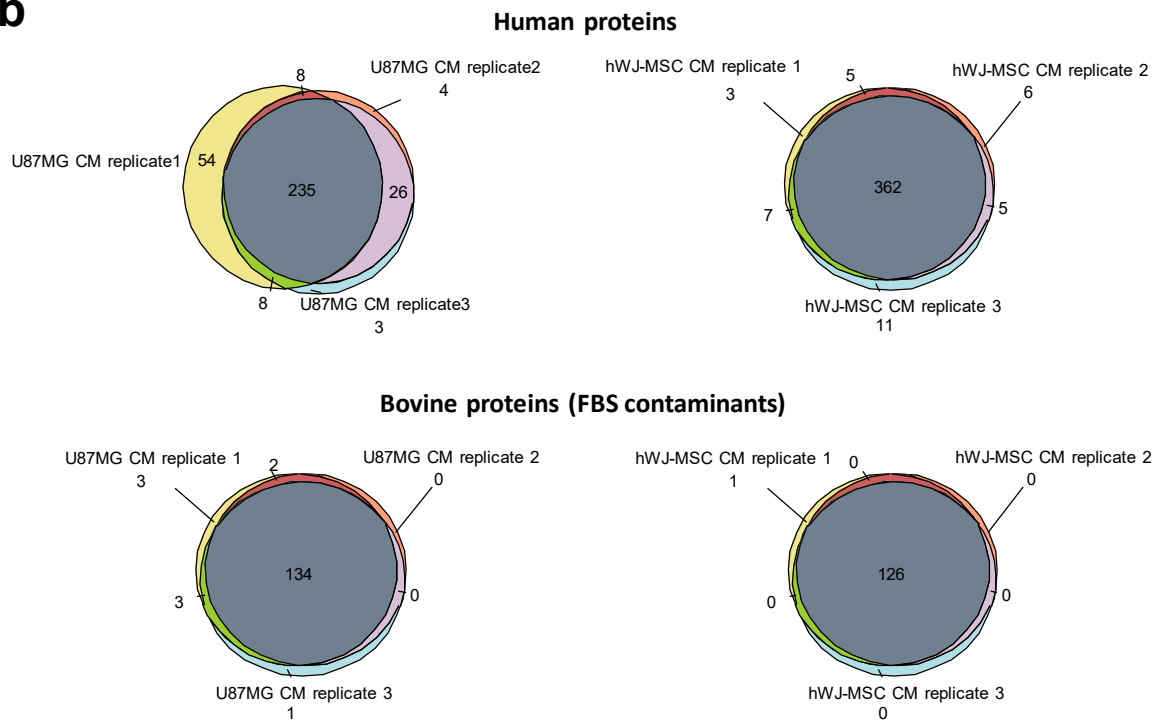**c**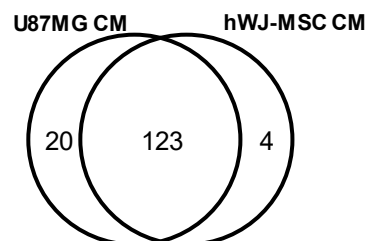

**Figure S4. Proteins identified in three replicate experiments of U87MG and hWJ-MSC secretomes. (a) Bar graphs and (b) Venn diagram of identified human and bovine proteins. (c) Venn diagram of FBS contaminant proteins between the secretomes of two cells.**

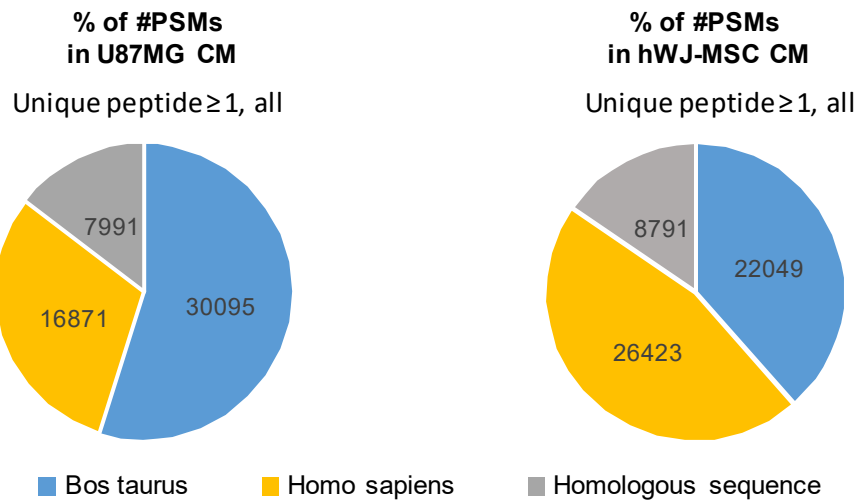

**Figure S5. The percentage of FBS contamination inferred by PSMs matched to bovine proteins in U87MG and hWJ-MSC secretomes.** Note that ‘homologous sequences’ are the peptides having identical sequences in both species. Therefore, it is impossible to tell at the peptide level where they are originated.

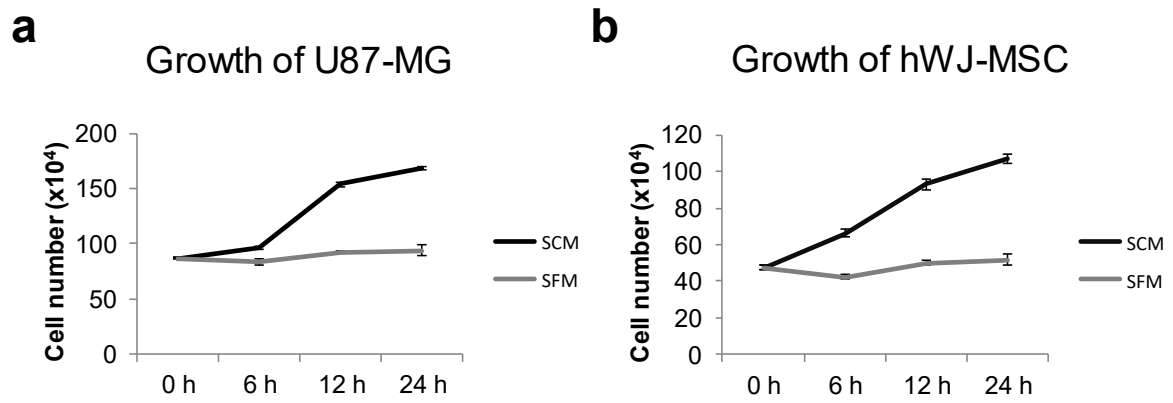

**Figure S6. Growth of U87MG (a) and hWJ-MSC (b) as measured by cell counting.** The relative area under the cell growth line from 0 h to 24 h were used as the normalization factors.

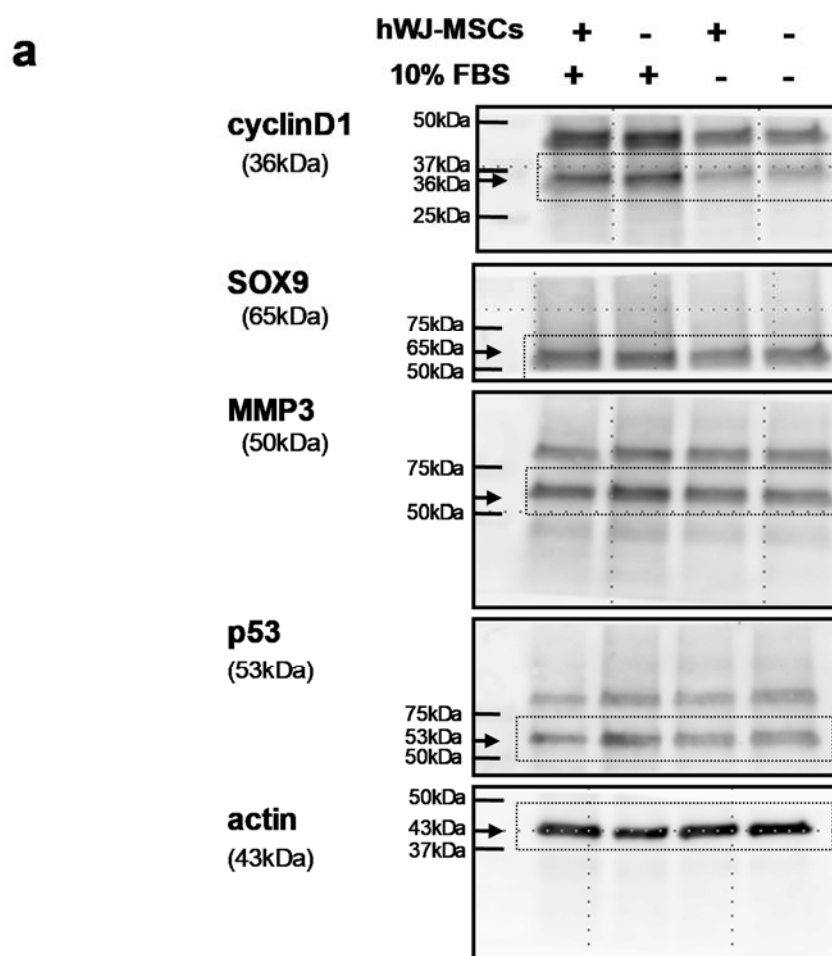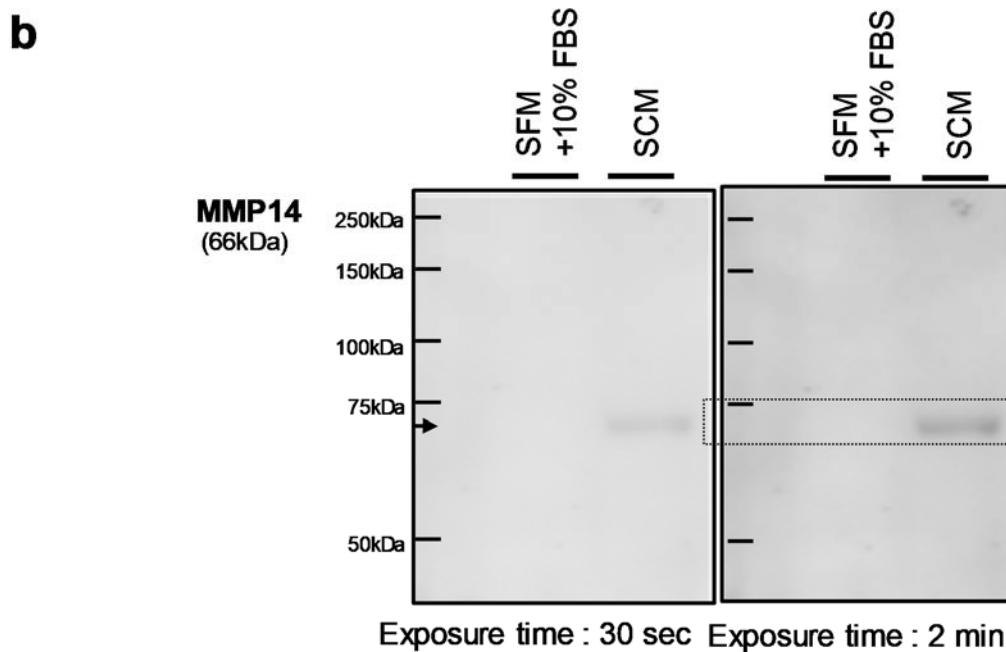

Figure S7. Full-length western blot images of Fig. 3d (a) and Fig. 4f (b).
